# Supplementary material
Source: publisher site journal article supplement (https://www.dovepress.com/article/449364)
Supplement: Supplementary file 1 [file get_supplementary_file.php]

## Additional file

**Appendix Table 1** Life expectancy at different ages

| Age   | Mean Age | PLE  | SLE  |
|-------|----------|------|------|
| 0-1   | 0.5      | 69.3 | 69.3 |
| 1-5   | 3        | 66.8 | 71   |
| 5-10  | 10       | 59.8 | 67.6 |
| 10-15 | 12.5     | 57.3 | 62.9 |
| 15-20 | 17.5     | 52.3 | 58.1 |
| 20-25 | 22.5     | 47.3 | 53.5 |
| 25-30 | 27.5     | 42.3 | 48.8 |
| 30-35 | 32.5     | 37.3 | 44.2 |
| 35-40 | 37.5     | 32.3 | 39.6 |
| 40-45 | 42.5     | 27.3 | 35.1 |
| 45-50 | 47.5     | 22.3 | 30.9 |
| 50-55 | 52.5     | 17.3 | 26.6 |
| 55-60 | 57.5     | 12.3 | 22.6 |
| 60-65 | 62.5     | 7.3  | 18.9 |
| 65-70 | 67.5     | 2.3  | 15.5 |
| 70-75 | 72.5     |      | 12.8 |
| 75-80 | 77.5     |      | 10.2 |
| 80-85 | 82.5     |      | 8.8  |
| 85+   | 87.5     |      | 7.2  |

Source: Sample registration system-abridged life tables 2015-2019

Note. PLE = Potential life expectancy, SLE = Standardised life expectancy

PLE = Life expectancy at birth – Mean age of each age group

Life expectancy at birth was 69.8 years in Odisha.

Standardised life expectancy compiled from sample registration system-abridged life tables 2015-2019.

**Appendix Table 2** Disability-adjusted life years among shrimp cultivator

| Sl. no    | Diseases code | Name of diseases              | NOPSD | DW    | YLD (0,0,PLE) | YLD (1,3,SLE) | NPD      | YLL (0,0,PLE) | YLL (1,3,SLE) | DALY (0,0,PLE) | DALY (1,3,SLE) | % Change in DALY |
|-----------|---------------|-------------------------------|-------|-------|---------------|---------------|----------|---------------|---------------|----------------|----------------|------------------|
| <b>1</b>  | <b>1</b>      | <b>Communicable diseases</b>  |       |       | <b>0.28</b>   | <b>0.360</b>  |          |               |               | <b>0.28</b>    | <b>0.36</b>    | <b>28.57</b>     |
| 2         | 1.1           | IPD                           | 11    |       | 0.28          | 0.360         |          |               |               | 0.28           | 0.36           | 28.57            |
| 3         | 1.1.1         | Tuberculosis                  | 1     | 0.333 | 0.194         | 0.27          |          |               |               | 0.194          | 0.27           | 39.18            |
| 4         | 1.1.2         | Parasitic and vector diseases | 10    |       | 0.085         | 0.090         |          |               |               | 0.085          | 0.090          | 5.88             |
| 5         | 1.1.2.1       | Malaria                       | 1     | 0.051 | 0.003         | 0.004         |          |               |               | 0.003          | 0.004          | 33.33            |
| 6         | 1.1.2.2       | Lymphatic filariasis          | 1     | 0.109 | 0.018         | 0.015         |          |               |               | 0.018          | 0.015          | -16.67           |
| 7         | 1.1.2.3       | Dengue fever                  | 1     | 0.133 | 0.008         | 0.011         |          |               |               | 0.008          | 0.011          | 37.50            |
| 8         | 1.1.2.4       | Covid-19                      | 1     | 0.133 | 0.011         | 0.01          |          |               |               | 0.011          | 0.010          | -9.09            |
| 9         | 1.1.2.5       | Typhoid                       | 3     | 0.133 | 0.028         | 0.03          |          |               |               | 0.028          | 0.030          | 7.14             |
| 10        | 1.1.2.6       | Eosinophilia                  | 3     | 0.006 | 0.018         | 0.02          |          |               |               | 0.018          | 0.020          | 11.11            |
| <b>11</b> | <b>2</b>      | <b>NCDs</b>                   |       |       | <b>25.62</b>  | <b>26</b>     | <b>3</b> | <b>74.7</b>   | <b>56.72</b>  | <b>100.32</b>  | <b>82.72</b>   | <b>-17.54</b>    |
| <b>12</b> | 2.1           | Malignant neoplasms           | 4     |       | 0.62          | 0.713         |          |               |               | 0.62           | 0.713          | 7.26             |
| 13        | 2.1.1         | Breast cancer                 | 1     | 0.083 | 0.048         | 0.066         |          |               |               | 0.048          | 0.066          | 37.50            |
| 14        | 2.1.2         | Metastatic                    | 3     | 0.451 | 0.613         | 0.643         |          |               |               | 0.613          | 0.643          | 4.89             |
| 15        | 2.2           | Endocrine diseases            | 3     |       | 0.43          | 0.443         |          |               |               | 0.43           | 0.443          | 3.02             |
| 16        | 2.2.1         | Thyroid                       | 3     | 0.145 | 0.43          | 0.443         |          |               |               | 0.43           | 0.443          | 3.02             |
| 17        | 2.3           | Diabetes                      | 20    | 0.133 | 2.66          | 2.244         | 1        | 15.9          | 13.23         | 18.56          | 15.474         | -16.63           |

| Sl. no | Diseases code | Name of diseases        | NOPSD | DW    | YLD (0,0,PLE) | YLD (1,3,SLE) | NPD | YLL (0,0,PLE) | YLL (1,3,SLE) | DALY (0,0,PLE) | DALY (1,3,SLE) | % Change in DALY |
|--------|---------------|-------------------------|-------|-------|---------------|---------------|-----|---------------|---------------|----------------|----------------|------------------|
| 18     | 2.4           | Neurological conditions | 7     |       | 0.46          | 0.356         |     |               |               | 0.46           | 0.356          | -24.02           |
| 19     | 2.4.1         | Post-polio syndrome     | 1     | 0.01  | 0.01          | 0.013         |     |               |               | 0.01           | 0.013          | 30.00            |
| 20     | 2.4..2        | Parkinson disease       | 1     | 0.267 | 0.07          | 0.041         |     |               |               | 0.07           | 0.041          | -41.43           |
| 21     | 2.4.3         | Headache                | 4     | 0.223 | 0.213         | 0.207         |     |               |               | 0.213          | 0.207          | -2.82            |
| 22     | 2.4.4         | Dementia                | 1     | 0.165 | 0.165         | 0.087         |     |               |               | 0.165          | 0.087          | -47.27           |
| 23     | 2.5           | Cardiovascular diseases | 9     |       | 1.93          | 1.688         | 1   | 19.9          | 15.71         | 21.83          | 17.398         | -20.51           |
| 24     | 2.5.1         | Stroke                  | 1     | 0.07  | 0.07          | 0.0539        |     |               |               | 0.07           | 0.0539         | -23.00           |
| 26     | 2.5.3         | High blood Pressure     | 11    | 0.179 | 1.69          | 1.40          |     |               |               | 1.69           | 1.40           | -16.92           |
| 27     | 2.5.4         | Low blood pressure      | 3     | 0.074 | 0.22          | 0.225         |     |               |               | 0.22           | 0.225          | 2.27             |
| 28     | 2.5.5         | Heart attack            | 0     |       |               | 0             | 1   | 19.9          | 15.71         | 19.9           | 15.710         | -21.06           |
| 29     | 2.6           | Respiratory diseases    | 4     |       | 0.06          | 0.052         |     |               |               | 0.06           | 0.052          | -13.33           |
| 30     | 2.6.1         | Asthma                  | 4     | 0.015 | 0.06          | 0.052         |     |               |               | 0.06           | 0.052          | -13.33           |
| 31     | 2.7           | Digestive diseases      | 35    |       | 5.41          | 5.836         |     |               |               | 5.41           | 5.836          | 7.87             |
| 32     | 2.7.1         | Gastric                 | 28    | 0.178 | 4.501         | 4.852         |     |               |               | 4.501          | 4.852          | 7.80             |
| 33     | 2.7.2         | Ulcer                   | 2     | 0.231 | 0.385         | 0.449         |     |               |               | 0.385          | 0.449          | 16.62            |
| 34     | 2.7.3         | Hernia                  | 2     | 0.114 | 0.008         | 0.007         |     |               |               | 0.008          | 0.007          | -12.50           |
| 35     | 2.7.4         | Crohns disease          | 3     | 0.231 | 0.52          | 0.528         |     |               |               | 0.52           | 0.528          | 1.54             |
| 36     | 2.8           | Skin diseases           | 7     |       | 0.17          | 0.186         |     |               |               | 0.17           | 0.186          | 9.41             |
| 37     | 2.8.1         | Allergy                 | 7     | 0.058 | 0.17          | 0.186         |     |               |               | 0.17           | 0.186          | 9.41             |

| Sl. no | Diseases code | Name of diseases         | NOPSD | DW    | YLD (0,0,PLE) | YLD (1,3,SLE) | NPD | YLL (0,0,PLE) | YLL (1,3,SLE) | DALY (0,0,PLE) | DALY (1,3,SLE) | % Change in DALY |
|--------|---------------|--------------------------|-------|-------|---------------|---------------|-----|---------------|---------------|----------------|----------------|------------------|
| 38     | 2.9           | Musculoskeletal diseases | 94    |       | 7.1           | 6.811         |     |               |               | 7.1            | 6.811          | -0.86            |
| 39     | 2.9.1         | Neck pain                | 1     | 0.114 | 0.114         | 0.086         |     |               |               | 0.114          | 0.086          | -24.56           |
| 40     | 2.9.2         | Back pain                | 1     | 0.372 | 0.37          | 0.386         |     |               |               | 0.37           | 0.386          | 4.32             |
| 41     | 2.9.3         | Waist pain               | 24    | 0.02  | 0.19          | 0.176         |     |               |               | 0.19           | 0.176          | -7.37            |
| 42     | 2.9.4         | Knee Pain                | 19    | 0.079 | 0.438         | 0.39          |     |               |               | 0.438          | 0.39           | -10.96           |
| 43     | 2.9.5         | Hand and leg pain        | 13    | 0.317 | 1.94          | 2.036         |     |               |               | 2.10           | 2.036          | -3.14            |
| 44     | 2.9.6         | Waist and knee Pain      | 17    | 0.317 | 2.86          | 2.787         |     |               |               | 2.86           | 2.787          | -2.55            |
| 45     | 2.9.7         | Leg pain                 | 7     | 0.079 | 0.221         | 0.198         |     |               |               | 0.221          | 0.198          | -10.41           |
| 46     | 2.9.8         | Chest pain               | 4     | 0.369 | 0.59          | 0.565         |     |               |               | 0.59           | 0.565          | -4.24            |
| 52     | 2.9.15        | Hand pain                | 8     | 0.117 | 0.343         | 0.384         |     |               |               | 0.343          | 0.384          | 11.95            |
| 55     | 2.10          | Oral conditions          | 2     |       | 0.0015        | 0.001         |     |               |               | 0.0015         | 0.001          | -33.33           |
| 56     | 2.10.1        | Teeth problem            | 2     | 0.01  | 0.002         | 0.001         |     |               |               | 0.002          | 0.001          | -50.00           |
| 57     | 2.11          | Sense organ diseases     | 8     |       | 0.26          | 0.178         |     |               |               | 0.26           | 0.178          | -31.54           |
| 58     | 2.11.1        | Hearing problem          | 5     | 0.05  | 0.25          | 0.168         |     |               |               | 0.25           | 0.168          | -32.80           |
| 59     | 2.11.2        | Other ear problem        | 2     | 0.013 | 0.005         | 0.006         |     |               |               | 0.005          | 0.006          | 20.00            |
| 60     | 2.11.3        | Eye problem              | 1     | 0.005 | 0.005         | 0.004         |     |               |               | 0.005          | 0.004          | -20.00           |
| 61     | 2.12          | Mental disorder          | 304   |       | 6.33          | 7.29          | 1   | 38.9          | 27.78         | 45.23          | 35.07          | -22.46           |

| Sl. no    | Diseases code | Name of diseases       | NOPSD | DW    | YLD (0,0,PLE) | YLD (1,3,SLE) | NPD | YLL (0,0,PLE) | YLL (1,3,SLE) | DALY (0,0,PLE) | DALY (1,3,SLE) | % Change in DALY |
|-----------|---------------|------------------------|-------|-------|---------------|---------------|-----|---------------|---------------|----------------|----------------|------------------|
| 62        | 2.12.1        | Bipolar disorder       | 1     | 0.492 | 0.49          | 0.274         |     |               |               | 0.49           | 0.274          | -44.08           |
| 63        | 2.12.2        | Depressive disorder    | 303   | 0.145 | 5.84          | 7.016         | 1   | 38.9          | 27.78         | 44.74          | 34.796         | -22.23           |
| 64        | 2.13          | Others                 | 11    |       | 0.18          | 0.201         |     |               |               | 0.18           | 0.201          | 11.67            |
| 65        | 2.13.1        | Abdominopelvic problem | 1     | 0.011 | 0.0009        | 0.001         |     |               |               | 0.0009         | 0.001          | 11.11            |
| 66        | 2.13.2        | Anaemia                | 9     | 0.004 | 0.0018        | 0.002         |     |               |               | 0.0018         | 0.002          | 11.11            |
| 67        | 2.12.3        | Vesicovaginal fistula  | 1     | 0.342 | 0.18          | 0.198         |     |               |               | 64.98          | 0.198          | 10.00            |
| <b>68</b> | <b>3</b>      | <b>Injury</b>          |       |       | <b>0.73</b>   | <b>0.8525</b> |     |               |               | <b>0.73</b>    | <b>0.8525</b>  | <b>4.50</b>      |
| 69        | 3.1           | TBILTC                 | 1     | 0.637 | 0.64          | 0.612         |     |               |               | 0.64           | 0.612          | -4.38            |
| 70        | 3.2           | Concussion             | 1     | 0.214 | 0.026         | 0.034         |     |               |               | 0.026          | 0.034          | 30.77            |
| 71        | 3.3           | Hand fracture          | 5     | 0.01  | 0.011         | 0.020         |     |               |               | 0.011          | 0.020          | 81.82            |
| 72        | 3.4           | Leg fracture           | 6     | 0.05  | 0.042         | 0.088         |     |               |               | 0.042          | 0.088          | 109.52           |
| 74        | 3.6           | Fracture of patella    | 1     | 0.05  | 0.011         | 0.009         |     |               |               | 0.011          | 0.009          | -18.18           |
| <b>80</b> | <b>Total</b>  |                        |       |       | <b>26.63</b>  | <b>27.3</b>   |     | <b>74.4</b>   | <b>56.72</b>  | <b>101.03</b>  | <b>84.02</b>   | <b>-16.84</b>    |

Source: Primary data

Note. NOPSD = Number of people suffered from diseases; MNYSO = Mean number of years suffering from diseases; DW = Disability weightage; YLD(0,0,PLE) = YLD calculated without age weightage (K = 0), without discounting (r = 0), and based on potential life expectancy; YLD(1,3,SL) = YLD calculated with age weightage (K = 1), with discounting (r = 3%), and based on standardized life expectancy; NPD = Number of people Death; YLL(0,0,PLE) = YLL calculated without age weightage (K = 0), without discounting (r =

0), and based on potential life expectancy; YLL (1,3,SLE) = YLL calculated with age weightage ( $K = 1$ ), with discounting ( $r = 3\%$ ), and based on standardized life expectancy; DALY(0,0,PLE) = DALY calculated without age weightage ( $K = 0$ ), without discounting ( $r = 0$ ), and based on potential life expectancy; DALY(1,3,SLE) = DALY calculated with age weightage ( $K = 1$ ), with discounting ( $r = 3\%$ ), and based on standardized life expectancy; NCDs = Non-communicable diseases; IPD = Infectious and parasitic disease; TBILTC = Traumatic brain injury long-term consequences.
